# Supplementary material for: A neutron scattering and modelling study of aqueous solutions of tetramethylammonium and tetrapropylammonium bromide
Source: Royal Society of Chemistry journal article supplement (doi:10.1039/c6cp01389a), 2016-01-01
Supplement: c6cp01389a1.pdf [file c6cp01389a1.pdf]

## Supporting Information

### A neutron scattering and modelling study of aqueous solutions of tetramethylammonium and tetrapropylammonium bromide

E. J. Nilsson, V. Alfredsson, D. T. Bowron and K. J. Edler

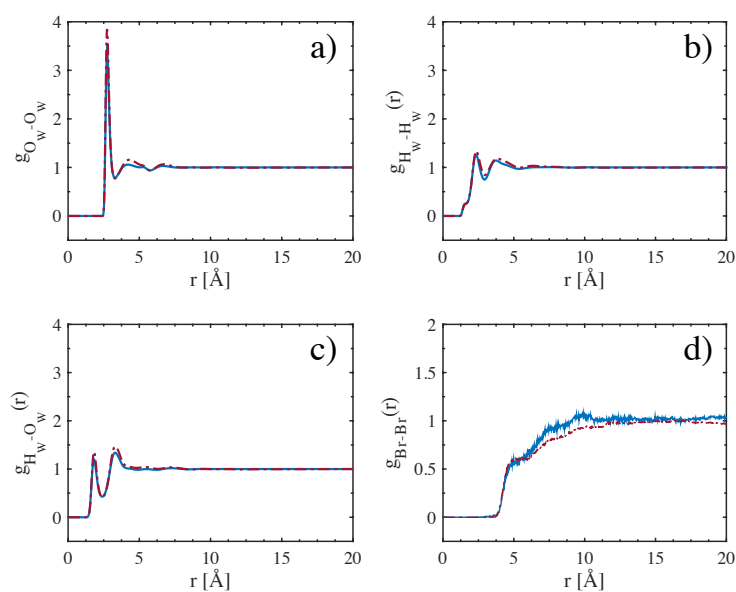

**Figure S1:** Radial distributions of the bromide and water for both the TMABr (solid blue line) and TPABr (dot-dashed red line) in water.

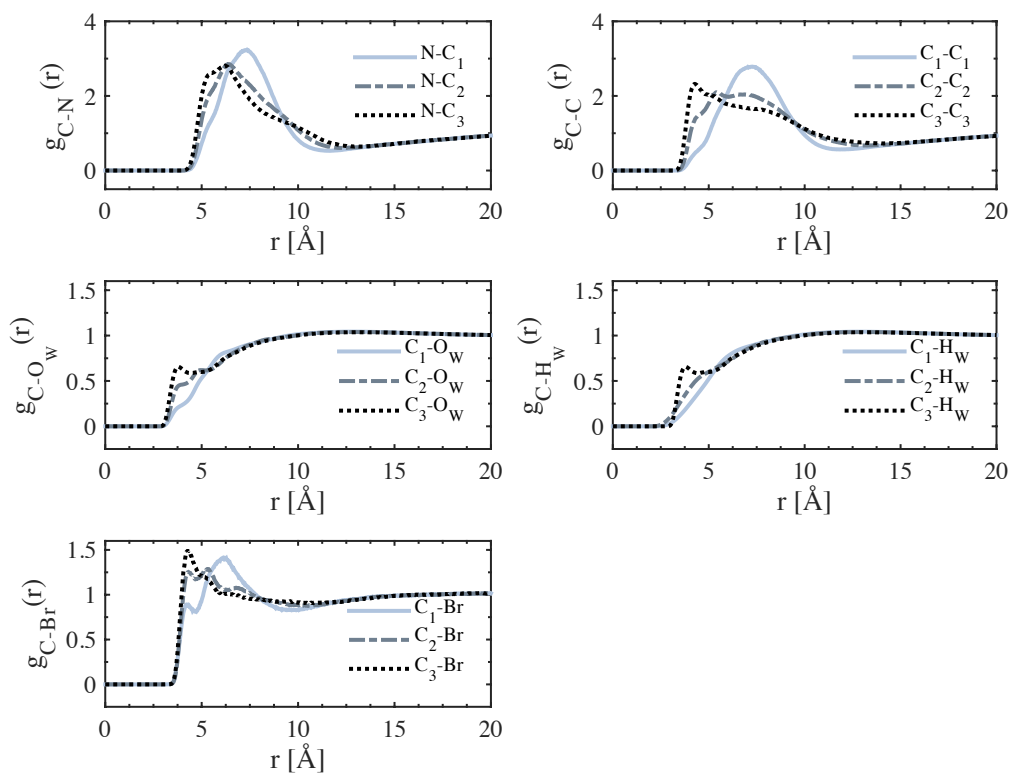

**Figure S2:** Radial distributions of the three different carbons in TPABr in water.

**Table S1:** Coordination number for 0.4 M TMABr in water, between  $R_{\min}$  and  $R_{\max}$ .

| pair-correlation                | $R_{\min}$ | $R_{\max}$ | Number of atoms | Standard error |
|---------------------------------|------------|------------|-----------------|----------------|
| N - N                           | 4.5        | 7.5        | 0.94            | $\pm 1.2$      |
|                                 | 4.5        | 10.5       | 1.9             | $\pm 1.8$      |
| N - C <sub>1</sub>              | 3.6        | 6.0        | 1.4             | $\pm 2.0$      |
|                                 | 3.6        | 8.5        | 4.8             | $\pm 5.3$      |
| N - Br                          | 3.4        | 6.5        | 0.48            | $\pm 0.65$     |
| N - O <sub>W</sub>              | 3.0        | 6.0        | 23              | $\pm 3.8$      |
| N - H <sub>W</sub>              | 3.0        | 6.4        | 7.3             | $\pm 16$       |
| C <sub>1</sub> - C <sub>1</sub> | 3.0        | 4.7        | 0.36            | $\pm 0.80$     |
|                                 | 3.0        | 9.1        | 5.5             | $\pm 5.8$      |
|                                 | 3.0        | 12.5       | 11              | $\pm 9.0$      |
| C <sub>1</sub> - Br             | 3.0        | 5.0        | 0.19            | $\pm 0.41$     |
| Br - O <sub>W</sub>             | 2.7        | 3.3        | 1.8             | $\pm 1.0$      |
| Br - O <sub>W</sub>             | 2.7        | 4.6        | 11              | $\pm 2.2$      |
| Br - H <sub>W</sub>             | 1.5        | 3.0        | 4.6             | $\pm 1.3$      |
| Br - Br                         | 3.5        | 5.9        | 0.079           | $\pm 0.28$     |
| Br - Br                         | 3.5        | 10.5       | 1.0             | $\pm 0.99$     |
| O <sub>W</sub> - O <sub>W</sub> | 2.3        | 3.3        | 4.3             | $\pm 1.2$      |
| H <sub>W</sub> - H <sub>W</sub> | 1.2        | 3.0        | 6.3             | $\pm 1.6$      |
| O <sub>W</sub> - H <sub>W</sub> | 1.3        | 2.4        | 2.0             | $\pm 0.87$     |

**Table S2: Coordination numbers for 0.4 M TPABr in water, between  $R_{\min}$  and  $R_{\max}$ .**

| pair-correlation                | $R_{\min}$ | $R_{\max}$ | Number of atoms | Standard error |
|---------------------------------|------------|------------|-----------------|----------------|
| N - N                           | 5.0        | 10.6       | 2.0             | $\pm 1.3$      |
| N - C <sub>3</sub>              | 3.9        | 8.3        | 4.1             | $\pm 2.8$      |
|                                 | 3.9        | 12.6       | 9.6             | $\pm 5.7$      |
| N - C <sub>1</sub>              | 3.9        | 11.3       | 8.3             | $\pm 5.4$      |
| N - C <sub>2</sub>              | 3.9        | 12.0       | 8.9             | $\pm 5.5$      |
| N - Br                          | 3.9        | 5.8        | 0.15            | $\pm 0.38$     |
|                                 | 3.9        | 8.6        | 0.66            | $\pm 0.76$     |
| N - O <sub>w</sub>              | 3.5        | 7.4        | 31              | $\pm 6.1$      |
|                                 | 3.5        | 10.4       | 0.00            | $\pm 0.00$     |
| N - H <sub>w</sub>              | 3.2        | 7.9        | 0.52            | $\pm 4.8$      |
|                                 | 3.2        | 9.5        | 0.00            | $\pm 0.00$     |
| C <sub>3</sub> - C <sub>3</sub> | 3.1        | 5.9        | 3.1             | $\pm 1.6$      |
|                                 | 3.1        | 13.8       | 13.9            | $\pm 6.1$      |
| C <sub>1</sub> - C <sub>1</sub> | 3.1        | 11.7       | 8.7             | $\pm 5.5$      |
| C <sub>2</sub> - C <sub>2</sub> | 3.1        | 6.0        | 3.6             | $\pm 1.4$      |
|                                 | 3.1        | 13.3       | 13              | $\pm 6.0$      |
| C <sub>3</sub> - Br             | 3.2        | 4.9        | 0.085           | $\pm 0.29$     |
|                                 | 3.2        | 6.0        | 0.20            | $\pm 0.43$     |
| C <sub>1</sub> - Br             | 3.2        | 4.7        | 0.040           | $\pm 0.20$     |
|                                 | 3.2        | 9.5        | 0.85            | $\pm 0.86$     |
| C <sub>2</sub> - Br             | 3.2        | 4.8        | 0.066           | $\pm 0.25$     |
|                                 | 3.2        | 6.2        | 0.22            | $\pm 0.45$     |
| Br - H <sub>w</sub>             | 1.5        | 3.0        | 4.3             | $\pm 1.3$      |
| Br - Br                         | 5.7        | 2.0        | 0.0             | $\pm 0.00$     |
|                                 | 3.5        | 8.5        | 0.39            | $\pm 0.60$     |
|                                 | 3.5        | 10.8       | 0.98            | $\pm 0.92$     |
| O <sub>w</sub> - O <sub>w</sub> | 2.3        | 3.3        | 4.4             | $\pm 1.2$      |
| H <sub>w</sub> - H <sub>w</sub> | 1.2        | 3.0        | 6.44            | $\pm 1.7$      |
| O <sub>w</sub> - H <sub>w</sub> | 1.3        | 2.4        | 1.98            | $\pm 0.88$     |
| Br - O <sub>w</sub>             | 2.7        | 3.3        | 1.76            | $\pm 1.0$      |
| Br - O <sub>w</sub>             | 2.7        | 4.6        | 10              | $\pm 2.4$      |

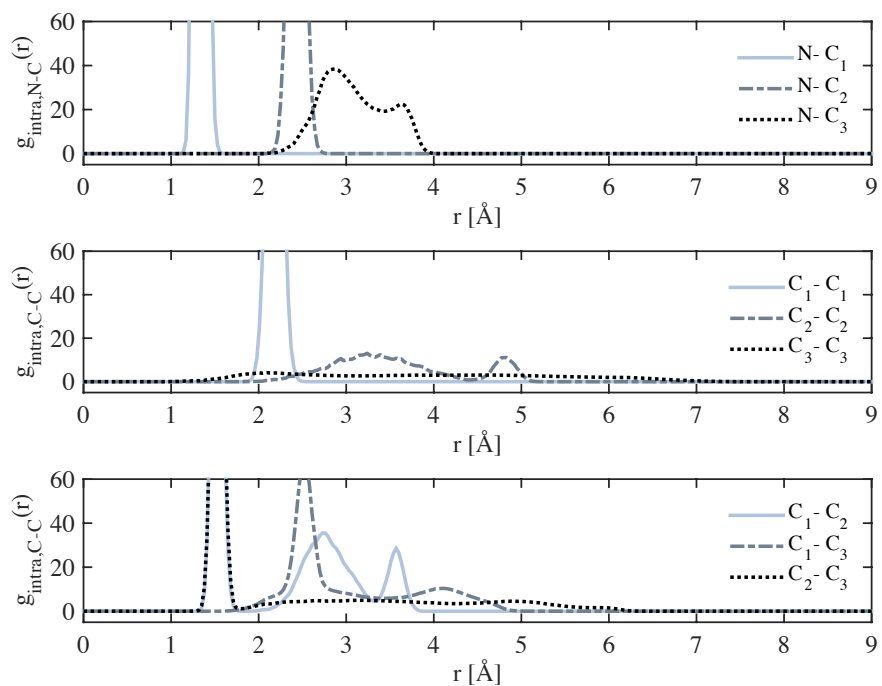

**Figure S3:** Internal partial radial distribution functions for nitrogen and carbons within the same TPA<sup>+</sup> molecule.

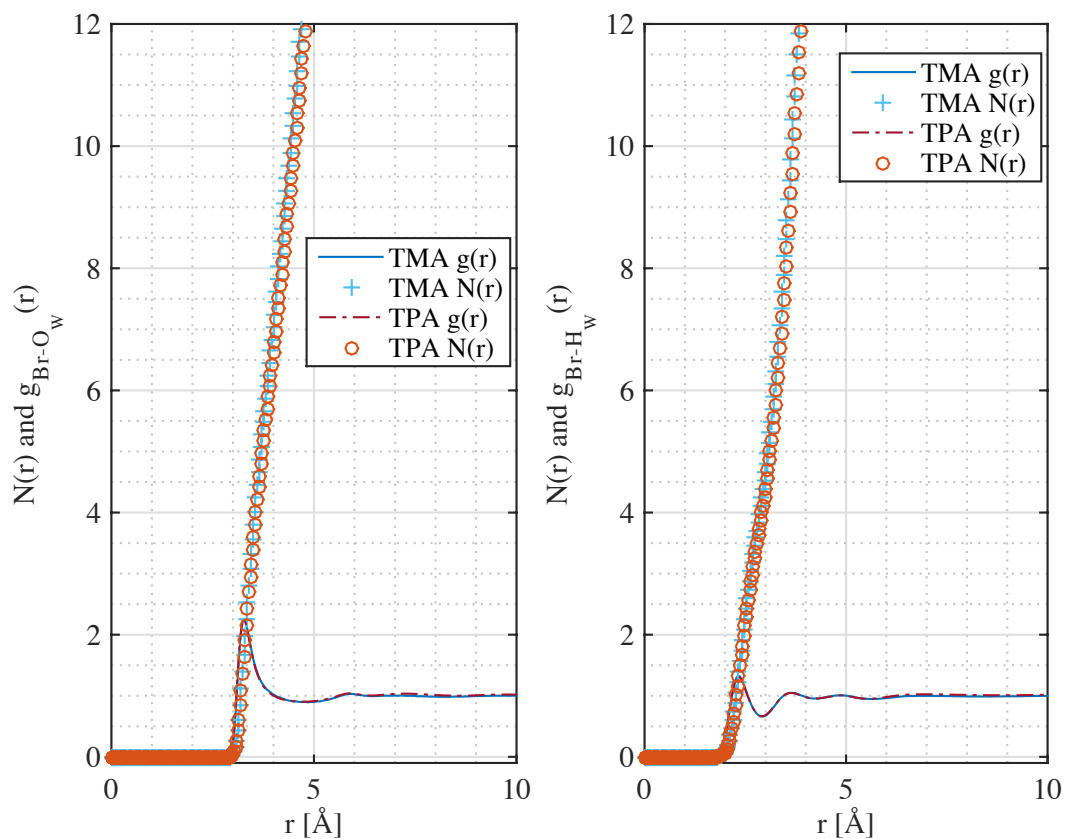

**Figure S4:** RDFs for bromide-water and the corresponding coordination number,  $N(r)$ .
